# Supplementary material for: Healthcare resource utilization and costs in patients with multiple myeloma administered ciltacabtagene autoleucel in outpatient versus inpatient settings after one to three prior lines of therapy
Source: Atypon-hosted journal article supplement (doi:10.57264/cer-2026-0052), 2026-06-29
Supplement: supplemtary data.docx [file supplemtary%20data.docx]

**Supplementary Table 1.** Summary of literature inputs and calculations

| **Source** | **Data source** | **Variable** | **Value** |
| --- | --- | --- | --- |
| **OP costs** |  |  |  |
| Jagannath et al., 2023 | CMS. Physician Fee Schedule Search | Total OP costs per 100 days | $3,128 (2021 USD) |
| Jagannath et al., 2023 | CMS. Physician Fee Schedule Search | Number of OP visits per 100 days | 28 |
| **IP costs** |  |  |  |
| Kuhr et al., 2025 | AHRQ, HCUP, NIS, 2021 | Total IP costs | $39,912 (2021 USD) |
| HCUP Cancer-Related Hospitalizations for Adults, 2017 | AHRQ, HCUP, NIS, 2017 | MM-related IP LOS | 11.1 days |
| **CPI Medical Care** |  |  |  |
| US Bureau of Labor Statistics | 2021 CPI | CPI Medical Care 2021 | 525.276 |
| US Bureau of Labor Statistics | 2025 CPI | CPI Medical Care 2025 | 576.029 |
| **Calculation of OP cost per day** |  |  |  |
|  | | | |
| **Calculation of IP cost per day** |  |  |  |
|  | | | |

**Abbreviations:** AHRQ: Agency for Healthcare Research and Quality; CMS: Centers for Medicare & Medicaid Services; CPI: Consumer Price Index; HCUP: Healthcare Cost and Utilization Project; IP: inpatient; LOS: length of stay; MM: multiple myeloma; NIS: National Inpatient Sample; OP: outpatient; USD: US dollars.

**Supplementary Table 2.** All-cause HCRU and costs1,2,3

|  | **OP cohort** | **IP cohort** | **IRR or Mean cost difference (95% CI), p-value** | | **Model diagnostics** |
| --- | --- | --- | --- | --- | --- |
|  | **N=37** | **N=62** | **Unadjusted** | **Adjusted4** | **Goodness of fit (χ²/DF)** |
| **Day 0-30** |  |  |  |  |  |
| **Follow-up duration (months), mean ± SD [median]** | **1.0 ± 0.2 [1.0]** | **1.0 ± 0.1 [1.0]** | – | – | – |
| **IP stays** |  |  |  |  |  |
| ≥1 IP stay, n (%) | 22 (59.5) | 62 (100.0) | – | – | – |
| Number of days (PPPM), mean ± SD [median] | 4.7 ± 5.2 [3.9] | 14.7 ± 5.0 [13.7] | 0.34 (0.23; 0.47), <0.001* | 0.31 (0.21; 0.42), <0.001* | 1.28 |
| IP-related costs (PPPM), mean ± SD [median] | 18,613 ± 20,326 [15,476] | 57,830 ± 19,594 [54,165] | -39,217 (-47,230; -30,336), <0.001* | -39,786 (-48,120; -30,765), <0.001* | 1.11 |
| **OP visits** |  |  |  |  |  |
| ≥1 OP visit, n (%) | 37 (100.0) | 60 (96.8) | – | – | – |
| Number of days (PPPM), mean ± SD [median] | 13.8 ± 8.9 [15.7] | 5.9 ± 3.6 [4.9] | 2.23 (1.75; 2.88), <0.001* | 1.88 (1.40; 2.56), <0.001* | 0.98 |
| OP-related costs (PPPM), mean ± SD [median] | 1,693 ± 1,086 [1,923] | 725 ± 440 [601] | 967 (651; 1,359), <0.001* | 788 (486; 1,188), <0.001* | 1.11 |
| **Day 0-90** |  |  |  |  |  |
| **Follow-up duration (months), mean ± SD [median]** | **2.6 ± 0.8 [3.0]** | **2.8 ± 0.5 [3.0]** | – | – | – |
| **IP stays** |  |  |  |  |  |
| ≥1 IP stay, n (%) | 24 (64.9) | 62 (100.0) | – | – | – |
| Number of days (PPPM), mean ± SD [median] | 2.7 ± 3.7 [1.7] | 7.6 ± 5.2 [5.0] | 0.36 (0.22; 0.55), <0.001* | 0.37 (0.20; 0.57), <0.001* | 1.28 |
| IP-related costs (PPPM), mean ± SD [median] | 10,630 ± 14,628 [6,590] | 30,156 ± 20,375 [19,770] | -19,526 (-26,165; -13,145), <0.001* | -18,428 (-25,255; -10,705), <0.001* | 1.11 |
| **OP visits** |  |  |  |  |  |
| ≥1 OP visit, n (%) | 37 (100.0) | 61 (98.4) | – | – | – |
| Number of days (PPPM), mean ± SD [median] | 11.0 ± 8.3 [10.0] | 5.7 ± 4.0 [5.1] | 1.78 (1.35; 2.40), <0.001* | 1.49 (1.01; 2.21), 0.044* | 0.98 |
| OP-related costs (PPPM), mean ± SD [median] | 1,347 ± 1,014 [1,228] | 704 ± 491 [627] | 643 (316; 968), <0.001* | 490 (187; 912), 0.004* | 1.11 |

*Indicates statistical significance; **Abbreviations:** CCI: Charlson Comorbidity Index;CI: confidence interval;CRAB: hypercalcemia, renal insufficiency, anemia, and bone lesions; HCRU: healthcare resource utilization; ICD-10 CM: International Classification of Diseases, 10th Revision, Clinical Modification; IP: inpatient; IRR: incidence rate ratio; MM: multiple myeloma; OP: outpatient; PPPM: per patient per month; SD: standard deviation.

**Notes:**

1. HCRU and costs were reported on a PPPM basis and evaluated over observation period defined as the time from the index date to the earliest of 90 days post-infusion, end of clinical activity, death, or end of data availability (June 30, 2025).

2. Costs were standardized to 2025 USD and calculated by multiplying the number of inpatient days by $3943.10/day and the number of outpatient days by $122.51/day.

3. The model adjusted for age (≥70 years), sex, race (White), payer type (Medicare), year of index (2024), Quan-CCI score, frailty index score within 3 months of infusion (nonfrail), and having ≥1 CRAB symptom 1 month prior to infusion. Model fit was assessed using Pearson chi-square statistics scaled by degrees of freedom. Values close to 1 indicated adequate model fit.

**Supplementary Table 3.** MM-related HCRU and costs1,2,3,4

|  | **OP cohort** | **IP cohort** | **IRR or Mean cost difference (95% CI), p-value** | | **Model diagnostics** |
| --- | --- | --- | --- | --- | --- |
|  | **N=37** | **N=62** | **Unadjusted** | **Adjusted4** | **Goodness of fit (χ²/DF)** |
| **Day 0-30** |  |  |  |  |  |
| **Follow-up duration (months), mean ± SD [median]** | **1.0 ± 0.2 [1.0]** | **1.0 ± 0.1 [1.0]** | – | – | – |
| **IP stays** |  |  |  |  |  |
| ≥1 IP stay, n (%) | 20 (54.1) | 62 (100.0) | – | – | – |
| Number of days (PPPM), mean ± SD [median] | 4.0 ± 4.8 [2.0] | 14.2 ± 5.0 [12.8] | 0.30 (0.19; 0.42), <0.001* | 0.27 (0.17; 0.38), <0.001* | 1.26 |
| IP-related costs (PPPM), mean ± SD [median] | 15,894 ± 18,861 [7,738] | 56,020 ± 19,584 [50,296] | -40,126 (-47,832; -31,992), <0.001* | -40,194 (-48,153; -32,101), <0.001* | 1.11 |
| **OP visits** |  |  |  |  |  |
| ≥1 OP visit, n (%) | 36 (97.3) | 57 (91.9) | – | – | – |
| Number of days (PPPM), mean ± SD [median] | 9.8 ± 7.6 [6.9] | 4.4 ± 2.6 [3.9] | 2.10 (1.54; 2.82), <0.001* | 1.76 (1.25; 2.46), <0.001* | 0.96 |
| OP-related costs (PPPM), mean ± SD [median] | 1,200 ± 932 [841] | 535 ± 322 [481] | 665 (393; 996), <0.001* | 581 (326; 943), <0.001* | 1.11 |
| **Day 0-90** |  |  |  |  |  |
| **Follow-up duration (months), mean ± SD [median]** | **2.6 ± 0.8 [3.0]** | **2.8 ± 0.5 [3.0]** | – | – | – |
| **IP stays** |  |  |  |  |  |
| ≥1 IP stay, n (%) | 22 (59.5) | 62 (100.0) | – | – | – |
| Number of days (PPPM), mean ± SD [median] | 2.5 ± 3.7 [1.7] | 7.4 ± 5.2 [5.0] | 0.35 (0.20; 0.55), <0.001* | 0.36 (0.18; 0.57), <0.001* | 1.29 |
| IP-related costs (PPPM), mean ± SD [median] | 9,925 ± 14,608 [6,590] | 29,330 ± 20,449 [19,770] | -19,405 (-25,746; -12,724), <0.001* | -18,072 (-25,047; -10,000), <0.001* | 1.11 |
| **OP visits** |  |  |  |  |  |
| ≥1 OP visit, n (%) | 37 (100.0) | 59 (95.2) | – | – | – |
| Number of days (PPPM), mean ± SD [median] | 6.8 ± 6.1 [6.4] | 3.8 ± 2.6 [3.2] | 1.59 (1.16; 2.14), 0.004* | 1.29 (0.89; 1.82), 0.172 | 0.91 |
| OP-related costs (PPPM), mean ± SD [median] | 835 ± 751 [778] | 463 ± 320 [389] | 372 (136; 625), <0.001* | 283 (25; 584), 0.020* | 1.11 |

*Indicates statistical significance; **Abbreviations:** CCI: Charlson Comorbidity Index;CI: confidence interval;CRAB: hypercalcemia, renal insufficiency, anemia, and bone lesions; HCRU: healthcare resource utilization; ICD-10 CM: International Classification of Diseases, 10th Revision, Clinical Modification; IP: inpatient; IRR: incidence rate ratio; MM: multiple myeloma; OP: outpatient; PPPM: per patient per month; SD: standard deviation.

**Notes:**

1. HCRU and costs were reported on a PPPM basis and evaluated over observation period defined as the time from the index date to the earliest of 90 days post-infusion, end of clinical activity, death, or end of data availability (June 30, 2025).

2. Costs were standardized to 2025 USD and calculated by multiplying the number of inpatient days by $3943.10/day and the number of outpatient days by $122.51/day.

3. MM-related medical claims are defined as those associated with an ICD-10-CM diagnosis of MM (C90.0).

4. The model adjusted for age (≥70 years), sex, race (White), payer type (Medicare), year of index (2024), Quan-CCI score, frailty index score within 3 months of infusion (nonfrail), and having ≥1 CRAB symptom 1 month prior to infusion. Model fit was assessed using Pearson chi-square statistics scaled by degrees of freedom. Values close to 1 indicated adequate model fit.

**Supplementary Table 4.** Covariate coefficients in multivariate models for demographic characteristics

|  | **Age (≥70 years v <70 years)** | **Sex (male v female)** | **Race (White v non-White)** | **Payer type (Medicare v non-Medicare)** | **Year of index (2024 v 2025)** |
| --- | --- | --- | --- | --- | --- |
| **HCRU** | **IRR (95% CI)** | **IRR (95% CI)** | **IRR (95% CI)** | **IRR (95% CI)** | **IRR (95% CI)** |
| **Day 0-30** |  |  |  |  |  |
| **All-cause** |  |  |  |  |  |
| Number of IP days | 1.02 (0.77; 1.34) | 1.19 (0.95; 1.48) | 0.94 (0.75; 1.18) | 0.95 (0.73; 1.23) | 0.99 (0.80; 1.24) |
| Number of OP days | 0.93 (0.67; 1.29) | 1.36 (1.06; 1.75) | 1.25 (0.97; 1.62) | 1.05 (0.76; 1.46) | 1.12 (0.87; 1.44) |
| **MM-related** |  |  |  |  |  |
| Number of IP days | 1.13 (0.85; 1.50) | 1.33 (1.05; 1.68) | 0.92 (0.73; 1.16) | 0.91 (0.69; 1.19) | 0.92 (0.73; 1.15) |
| Number of OP days | 1.14 (0.81; 1.59) | 1.32 (1.01; 1.72) | 0.94 (0.72; 1.24) | 1.05 (0.75; 1.47) | 1.06 (0.81; 1.38) |
| **Day 0-90** |  |  |  |  |  |
| **All-cause** |  |  |  |  |  |
| Number of IP days | 1.00 (0.65; 1.54) | 0.91 (0.64; 1.28) | 0.87 (0.61; 1.23) | 1.06 (0.71; 1.58) | 1.32 (0.94; 1.87) |
| Number of OP days | 0.98 (0.67; 1.44) | 1.75 (1.31; 2.34) | 1.47 (1.10; 1.98) | 1.03 (0.71; 1.50) | 1.17 (0.88; 1.58) |
| **MM-related** |  |  |  |  |  |
| Number of IP days | 1.05 (0.66; 1.67) | 0.96 (0.66; 1.40) | 0.83 (0.57; 1.21) | 1.05 (0.68; 1.62) | 1.24 (0.86; 1.79) |
| Number of OP days | 1.03 (0.70; 1.52) | 1.62 (1.21; 2.17) | 1.10 (0.81; 1.47) | 1.07 (0.73; 1.56) | 1.26 (0.94; 1.69) |
| **Costs** | **Mean monthly cost difference (95% CI)** | **Mean monthly cost difference (95% CI)** | **Mean monthly cost difference (95% CI)** | **Mean monthly cost difference (95% CI)** | **Mean monthly cost difference (95% CI)** |
| **Day 0-30** |  |  |  |  |  |
| **All-cause** |  |  |  |  |  |
| Number of IP days | 2,997 (-6,193; 12,187) | 6,179 (-1,480; 13,839) | -5,079 (-12,629; 2,470) | -2,381 (-11,523; 6,760) | -697 (-8,304; 6,910) |
| Number of OP days | 30 (-312; 372) | 416 (131; 701) | 119 (-162; 400) | 54 (-287; 394) | 187 (-97; 470) |
| **MM-related** |  |  |  |  |  |
| Number of IP days | 5,501 (-3,362; 14,365) | 7,923 (536; 15,311) | -4,925 (-12,206; 2,356) | -4,011 (-12,828; 4,806) | -3,546 (-10,882; 3,791) |
| Number of OP days | 181 (-97; 459) | 271 (39; 503) | -163 (-391; 66) | 91 (-185; 368) | 92 (-138; 323) |
| **Day 0-90** |  |  |  |  |  |
| **All-cause** |  |  |  |  |  |
| Number of IP days | 2,681 (-5,999; 11,362) | -3,843 (-11,078; 3,393) | -7,124 (-14,255; 7) | -1,695 (-10,330; 6,941) | 6,081 (-1,105; 13,266) |
| Number of OP days | 16 (-308; 341) | 555 (285; 826) | 262 (-5; 528) | 99 (-224; 422) | 198 (-71; 466) |
| **MM-related** |  |  |  |  |  |
| Number of IP days | 3,426 (-5,368; 12,220) | -3,193 (-10,523; 4,137) | -7,432 (-14,656; -208) | -2,203 (-10,951; 6,545) | 4,534 (-2,745; 11,813) |
| Number of OP days | 72 (-163; 307) | 328 (133; 524) | -50 (-243; 142) | 121 (-112; 354) | 195 (1; 389) |

**Abbreviations:** CI: confidence interval; HCRU: healthcare resource utilization; IP: inpatient; IRR: incidence rate ratio; MM: multiple myeloma; OP: outpatient.

**Supplementary Table 5.** Covariate coefficients in multivariate models for clinical characteristics

|  | **Quan-CCI** | **Frailty (nonfrail v prefrail-to-severe frailty)1** | **CRAB symptoms (≥1 v none)2** |
| --- | --- | --- | --- |
| **HCRU** | **IRR (95% CI)** | **IRR (95% CI)** | **IRR (95% CI)** |
| **Day 0-30** |  |  |  |
| **All-cause** |  |  |  |
| Number of IP days | 0.94 (0.88; 1.01) | 1.38 (1.01; 1.88) | 1.46 (1.10; 1.93) |
| Number of OP days | 1.01 (0.93; 1.09) | 1.27 (0.90; 1.78) | 0.71 (0.52; 0.95) |
| **MM-related** |  |  |  |
| Number of IP days | 0.95 (0.89; 1.02) | 1.42 (1.03; 1.95) | 1.39 (1.04; 1.85) |
| Number of OP days | 0.98 (0.90; 1.06) | 1.23 (0.86; 1.76) | 0.64 (0.47; 0.88) |
| **Day 0-90** |  |  |  |
| **All-cause** |  |  |  |
| Number of IP days | 0.98 (0.88; 1.10) | 1.13 (0.71; 1.78) | 1.54 (1.01; 2.37) |
| Number of OP days | 1.03 (0.93; 1.13) | 1.24 (0.83; 1.87) | 0.72 (0.50; 1.02) |
| **MM-related** |  |  |  |
| Number of IP days | 0.99 (0.87; 1.11) | 1.13 (0.70; 1.84) | 1.44 (0.91; 2.27) |
| Number of OP days | 1.00 (0.90; 1.10) | 1.22 (0.81; 1.84) | 0.65 (0.45; 0.93) |
| **Costs** | **Mean monthly cost difference (95% CI)** | **Mean monthly cost difference (95% CI)** | **Mean monthly cost difference (95% CI)** |
| **Day 0-30** |  |  |  |
| **All-cause** |  |  |  |
| IP-related costs | -2,167 (-4,599; 265) | 8,466 (-1,753; 18,684) | 11,456 (2,312; 20,600) |
| OP-related costs | -33 (-124; 57) | 213 (-168; 594) | -404 (-744; -63) |
| **MM-related** |  |  |  |
| IP-related costs | -1,575 (-3,920; 770) | 8,206 (-1,649; 18,061) | 9,122 (303; 17,941) |
| OP-related costs | -43 (-117; 30) | 190 (-119; 500) | -354 (-631; -77) |
| **Day 0-90** |  |  |  |
| **All-cause** |  |  |  |
| IP-related costs | -66 (-2,363; 2,230) | 1,920 (-7,732; 11,572) | 9,600 (962; 18,237) |
| OP-related costs | -16 (-102; 70) | 90 (-270; 451) | -332 (-655; -9) |
| **MM-related** |  |  |  |
| IP-related costs | 193 (-2,133; 2,520) | 1,919 (-7,859; 11,697) | 8,450 (-299; 17,200) |
| OP-related costs | -24 (-86; 38) | 98 (-163; 358) | -249 (-482; -15) |

**Abbreviations:** CCI: Charlson Comorbidity Index; CI: confidence interval; CRAB: hypercalcemia, renal insufficiency, anemia, and bone lesions; HCRU: healthcare resource utilization; IP: inpatient; IRR: incidence rate ratio; MM: multiple myeloma; OP: outpatient.

**Notes:**

1. Assessed in the 3 months prior to infusion.

2. Assessed in the 1 month prior to infusion.
